# Supplementary material for: A Proposed Classification of ICD-11 Severity Degrees of Personality Pathology Using the Self and Interpersonal Functioning Scale
Source: PubMed Central journal article supplement (PMC8012561; doi:10.3389/fpsyt.2021.628057), 2021-03-18
Supplement: Table_1.pdf [file Table_1.pdf]

**Table S1***Socio-Demographic Characteristics for the Five Combined Samples*

| Socio-Demographic Characteristic |           | Sample 1<br>(n = 287) | Sample 2<br>(n = 249) | Sample 3<br>(n = 242) | Sample 4<br>(n = 1200) | Sample 5<br>(n = 263) |
|----------------------------------|-----------|-----------------------|-----------------------|-----------------------|------------------------|-----------------------|
| Age                              | <i>M</i>  | 33.73                 | 36.87                 | 33.46                 | 29.56                  | 30.57                 |
|                                  | <i>SD</i> | 10.54                 | 13.49                 | 9.14                  | 4.01                   | 11.86                 |
| % Gender                         | Female    | 62.0                  | 68.7                  | 63.6                  | 100                    | 73.0                  |
|                                  | Male      | 38.0                  | 30.9                  | 36.4                  | ---                    | 27.0                  |
|                                  | Other     | ---                   | 0.4                   | ---                   | ---                    | ---                   |
| % in a relationship              |           | 36.2                  | 53.0 <sup>a</sup>     | 70.1                  | 100                    | Not available         |
| % active (work, school)          |           | 47.7                  | 49.0 <sup>a</sup>     | 90.2                  | 79.7 <sup>b</sup>      | 92.1                  |
| % Post high-school degree        |           | 63.1                  | 79.0 <sup>a</sup>     | 93.0                  | 94.4                   | 95.7                  |

*Note.* Sample 1 = Specialized psychiatric outpatient clinic for more severe PD; Sample 2 = Outpatient treatment establishments for less severe PD; Sample 3 = Private practice clinics; Sample 4 = Pregnant women; Sample 5 = Community participants; PD = Personality disorder.

<sup>a</sup> Data unavailable for 44 participants.

<sup>b</sup> For Sample 4 (pregnant women), includes preventive withdrawal from work due to pregnancy.
