# Supplementary material for: A Proposed Classification of ICD-11 Severity Degrees of Personality Pathology Using the Self and Interpersonal Functioning Scale
Source: PubMed Central journal article supplement (PMC8012561; doi:10.3389/fpsyt.2021.628057), 2021-03-18
Supplement: Table_2.pdf [file Table_2.pdf]

**Table S2***Descriptive Statistics on Personality and Symptoms Measures for the Five Samples*

| Scale                                   | Statistic     | Sample 1<br>( <i>n</i> = 287) | Sample 2<br>( <i>n</i> = 249) | Sample 3<br>( <i>n</i> = 242) | Sample 4<br>( <i>n</i> = 1200) | Sample 5<br>( <i>n</i> = 263) |
|-----------------------------------------|---------------|-------------------------------|-------------------------------|-------------------------------|--------------------------------|-------------------------------|
| SIFS Total                              | <i>M (SD)</i> | 1.90 (.61)                    | 1.69 (.60)                    | 1.13 (.55)                    | .79 (.42)                      | .98 (.49)                     |
|                                         | <i>α</i>      | .85                           | .86                           | .87                           | .86                            | .87                           |
| SIFS Identity                           | <i>M (SD)</i> | 2.55 (.70)                    | 2.37 (.76)                    | 1.63 (.80)                    | 1.05 (.55)                     | 1.29 (.71)                    |
|                                         | <i>α</i>      | .65                           | .70                           | .80                           | .73                            | .80                           |
| SIFS Self-Direction                     | <i>M (SD)</i> | 1.99 (.84)                    | 1.82 (.82)                    | 1.28 (.76)                    | .96 (.56)                      | 1.11 (.58)                    |
|                                         | <i>α</i>      | .67                           | .65                           | .69                           | .61                            | .59                           |
| SIFS Empathy                            | <i>M (SD)</i> | 1.35 (.78)                    | 1.22 (.74)                    | .78 (.61)                     | .62 (.50)                      | .70 (.52)                     |
|                                         | <i>α</i>      | .68                           | .65                           | .68                           | .65                            | .60                           |
| SIFS Intimacy                           | <i>M (SD)</i> | 1.66 (.89)                    | 1.32 (.81)                    | .81 (.67)                     | .55 (.51)                      | .84 (.69)                     |
|                                         | <i>α</i>      | .72                           | .71                           | .72                           | .69                            | .78                           |
| PID-5 Negative Affectivity <sup>a</sup> | <i>M (SD)</i> | 1.88 (.61)                    | 1.73 (.60)                    | 1.19 (.59)                    |                                | 1.39 (.70)                    |
|                                         | <i>α</i>      | .85                           | .61                           | .87                           |                                | .89                           |
| PID-5 Detachment <sup>a</sup>           | <i>M (SD)</i> | 1.45 (.63)                    | 1.15 (.65)                    | .63 (.50)                     |                                | .89 (.67)                     |
|                                         | <i>α</i>      | .85                           | .64                           | .86                           |                                | .90                           |
| PID-5 Antagonism <sup>a</sup>           | <i>M (SD)</i> | .66 (.61)                     | .71 (.60)                     | .49 (.43)                     |                                | .55 (.51)                     |
|                                         | <i>α</i>      | .90                           | .72                           | .86                           |                                | .88                           |

| Scale                            | Statistic     | Sample 1<br>( <i>n</i> = 287) | Sample 2<br>( <i>n</i> = 249) | Sample 3<br>( <i>n</i> = 242) | Sample 4<br>( <i>n</i> = 1200) | Sample 5<br>( <i>n</i> = 263) |
|----------------------------------|---------------|-------------------------------|-------------------------------|-------------------------------|--------------------------------|-------------------------------|
| PID-5 Disinhibition <sup>a</sup> | <i>M (SD)</i> | 1.49 (.61)                    | 1.15 (.59)                    | .92 (.57)                     |                                | 1.03 (.63)                    |
|                                  | <i>α</i>      | .85                           | .60                           | .88                           |                                | .89                           |
| PID-5 Psychoticism <sup>a</sup>  | <i>M (SD)</i> | .86 (.60)                     | 1.08 (.63)                    | .37 (.40)                     |                                | .48 (.52)                     |
|                                  | <i>α</i>      | .86                           | .69                           | .83                           |                                | .88                           |
| BSL-23                           | <i>M (SD)</i> | 2.00 (.92)                    | 1.75 (.93)                    |                               |                                |                               |
|                                  | <i>α</i>      | .93                           | .95                           |                               |                                |                               |
| PNI Grandiosity                  | <i>M (SD)</i> | 2.30 (.97)                    | 2.17 (.85)                    |                               |                                |                               |
|                                  | <i>α</i>      | .85                           | .78                           |                               |                                |                               |
| PNI Vulnerable                   | <i>M (SD)</i> | 2.41 (1.00)                   | 2.25 (.92)                    |                               |                                |                               |
|                                  | <i>α</i>      | .88                           | .86                           |                               |                                |                               |
| BPAQ Trait aggression            | <i>M (SD)</i> | 3.25 (1.12)                   |                               |                               |                                |                               |
|                                  | <i>α</i>      | .87                           |                               |                               |                                |                               |
| BPAQ Verbal Aggression           | <i>M (SD)</i> | 2.93 (1.20)                   |                               |                               |                                |                               |
|                                  | <i>α</i>      | .60                           |                               |                               |                                |                               |
| BPAQ Physical Aggression         | <i>M (SD)</i> | 2.54 (1.61)                   |                               |                               |                                |                               |
|                                  | <i>α</i>      | .86                           |                               |                               |                                |                               |
| BPAQ Hostility                   | <i>M (SD)</i> | 3.82 (1.40)                   |                               |                               |                                |                               |
|                                  | <i>α</i>      | .69                           |                               |                               |                                |                               |
| BPAQ Anger                       | <i>M (SD)</i> | 3.73 (1.46)                   |                               |                               |                                |                               |
|                                  | <i>α</i>      | .82                           |                               |                               |                                |                               |

| Scale                  | Statistic                          | Sample 1<br>( <i>n</i> = 287) | Sample 2<br>( <i>n</i> = 249) | Sample 3<br>( <i>n</i> = 242) | Sample 4<br>( <i>n</i> = 1200) | Sample 5<br>( <i>n</i> = 263) |
|------------------------|------------------------------------|-------------------------------|-------------------------------|-------------------------------|--------------------------------|-------------------------------|
| IRI Perspective Taking | <i>M</i> ( <i>SD</i> )<br><i>α</i> | 4.54 (1.34)<br>.85            |                               |                               |                                | 4.92 (1.05)<br>.82            |
| IRI Empathic Concern   | <i>M</i> ( <i>SD</i> )<br><i>α</i> | 5.39 (1.11)<br>.78            |                               |                               |                                | 5.45 (.95)<br>.77             |
| BIS-11 Attentional     | <i>M</i> ( <i>SD</i> )<br><i>α</i> | 2.56 (.51)<br>.67             |                               |                               |                                |                               |
| BIS-11 Motor           | <i>M</i> ( <i>SD</i> )<br><i>α</i> | 2.30 (.55)<br>.76             |                               |                               |                                |                               |
| BIS-11 Nonplanning     | <i>M</i> ( <i>SD</i> )<br><i>α</i> | 2.55 (.44)<br>.70             |                               |                               |                                |                               |
| PSI Total              | <i>M</i> ( <i>SD</i> )<br><i>α</i> |                               |                               | 1.11 (.56)<br>.88             |                                |                               |
| ECR Anxiety            | <i>M</i> ( <i>SD</i> )<br><i>α</i> |                               |                               | 4.07 (1.40)<br>.86            |                                |                               |
| ECR Avoidance          | <i>M</i> ( <i>SD</i> )<br><i>α</i> |                               |                               | 2.69 (1.12)<br>.85            |                                |                               |
| K-10                   | <i>M</i> ( <i>SD</i> )<br><i>α</i> |                               |                               |                               | 2.12 (.68)<br>.81              |                               |
| EPDS                   | <i>M</i> ( <i>SD</i> )             |                               |                               |                               | 1.92 (.51)                     |                               |

| Scale                  | Statistic     | Sample 1<br>( <i>n</i> = 287) | Sample 2<br>( <i>n</i> = 249) | Sample 3<br>( <i>n</i> = 242) | Sample 4<br>( <i>n</i> = 1200) | Sample 5<br>( <i>n</i> = 263) |
|------------------------|---------------|-------------------------------|-------------------------------|-------------------------------|--------------------------------|-------------------------------|
|                        | $\alpha$      |                               |                               |                               | .85                            |                               |
| PANAS Positive Affect  | <i>M (SD)</i> |                               |                               |                               | 2.77 (.62)                     |                               |
|                        | $\alpha$      |                               |                               |                               | .82                            |                               |
| PANAS Negative Affect  | <i>M (SD)</i> |                               |                               |                               | 2.30 (.71)                     |                               |
|                        | $\alpha$      |                               |                               |                               | .81                            |                               |
| DES Absorption         | <i>M (SD)</i> |                               |                               |                               | 1.68 (1.48)                    |                               |
|                        | $\alpha$      |                               |                               |                               | .83                            |                               |
| DES Depersonalization  | <i>M (SD)</i> |                               |                               |                               | .64 (1.34)                     |                               |
|                        | $\alpha$      |                               |                               |                               | .76                            |                               |
| PCL-5                  | <i>M (SD)</i> |                               |                               |                               | .70 (.60)                      |                               |
|                        | $\alpha$      |                               |                               |                               | .92                            |                               |
| IPO Total              | <i>M (SD)</i> |                               |                               |                               |                                | 1.73 (.42)                    |
|                        | $\alpha$      |                               |                               |                               |                                | .82                           |
| IPO Identity Diffusion | <i>M (SD)</i> |                               |                               |                               |                                | 2.34 (.62)                    |
|                        | $\alpha$      |                               |                               |                               |                                | .66                           |
| IPO Primitive Defenses | <i>M (SD)</i> |                               |                               |                               |                                | 1.74 (.62)                    |
|                        | $\alpha$      |                               |                               |                               |                                | .75                           |
| IPO Reality Testing    | <i>M (SD)</i> |                               |                               |                               |                                | 1.27 (.40)                    |
|                        | $\alpha$      |                               |                               |                               |                                | .77                           |

| Scale | Statistic              | Sample 1<br>( <i>n</i> = 287) | Sample 2<br>( <i>n</i> = 249) | Sample 3<br>( <i>n</i> = 242) | Sample 4<br>( <i>n</i> = 1200) | Sample 5<br>( <i>n</i> = 263) |
|-------|------------------------|-------------------------------|-------------------------------|-------------------------------|--------------------------------|-------------------------------|
| SWLS  | <i>M</i> ( <i>SD</i> ) |                               |                               |                               |                                | 5.16 (1.26)                   |
|       | $\alpha$               |                               |                               |                               |                                | .89                           |
| RSES  | <i>M</i> ( <i>SD</i> ) |                               |                               |                               |                                | 3.19 (.57)                    |
|       | $\alpha$               |                               |                               |                               |                                | .90                           |

*Note.* Sample 1 = Specialized psychiatric outpatient clinic for more severe PD; Sample 2 = Outpatient treatment establishments for less severe PD; Sample 3 = Private practice clinics; Sample 4 = Pregnant women; Sample 5 = Community participants. SIFS = Self and Interpersonal Functioning Scale; BSL-23 = 23-item Borderline Symptoms List; PNI = Brief Version of the Pathological Narcissism Inventory; PID-5 = Personality Inventory for DSM-5; BPAQ = 12-item version of the Buss-Perry Aggression Questionnaire; IRI = Interpersonal Reactivity Index; BIS-11 = Barratt Impulsiveness Scale (version 11); PSI = 14-item version of the Psychiatric Symptom Index; ECR = 12-item version of the Experiences in Close Relationships questionnaire; K-10 = Kessler Psychological Distress Scale; EPDS = Edinburgh Perinatal/Postnatal Depression Scale; PANAS = Positive and Negative Affect Schedule;. DES = Dissociative Experiences Scale; PCL-5 = Posttraumatic Stress Disorder Checklist for DSM-5; IPO = Brief 19-item version of the Inventory of Personality Organization; SWLS = Satisfaction with Life Scale; RSES = Rosenberg Self-Esteem Scale.

<sup>a</sup> For Samples 1, 3 and 5, the 100-item version of the PID-5 (PID-5 Faceted Brief Form) was used. For Sample 2, the 25-item version (PID-5 Brief Form) was used.
